# Supplementary material for: Well-controlled synthesis of wurtzite-type Cu2ZnSnS4 nanoparticles using multiple sulfur sources via a two-step heating process
Source: Royal Society of Chemistry journal article supplement (doi:10.1039/c4ce01852d), 2014-11-05
Supplement: c4ce01852d1.pdf [file c4ce01852d1.pdf]

## Electronic Supplementary Information

# Well-Controlled Synthesis of Wurtzite-Type $\text{Cu}_2\text{ZnSnS}_4$ Nanoparticles Using Multiple Sulfur Sources via a Two-Step Heating Process

Hiroyasu Nishi,\*<sup>a</sup> Takahito Nagano,<sup>a</sup> Tatsuya Kameyama,<sup>a</sup> Susumu Kuwabata,<sup>b</sup> and Tsukasa Torimoto\*<sup>a</sup>

---

<sup>a</sup> *Department of Crystalline Materials Science, Graduate School of Engineering, Nagoya University, Furo-cho, Chikusa-ku, Nagoya 464-8603, Japan.*

<sup>b</sup> *Department of Applied Chemistry, Graduate School of Engineering, Osaka University, 2-1 Yamadaoka, Suita, Osaka 565-0871, Japan.*

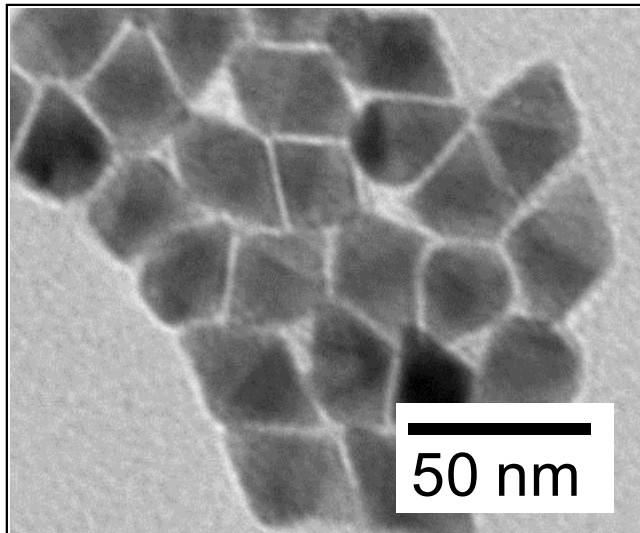

**Fig. S1** A TEM image of nanoparticles obtained by heating the metal acetates in DDT at 240 ° C for 60 min.

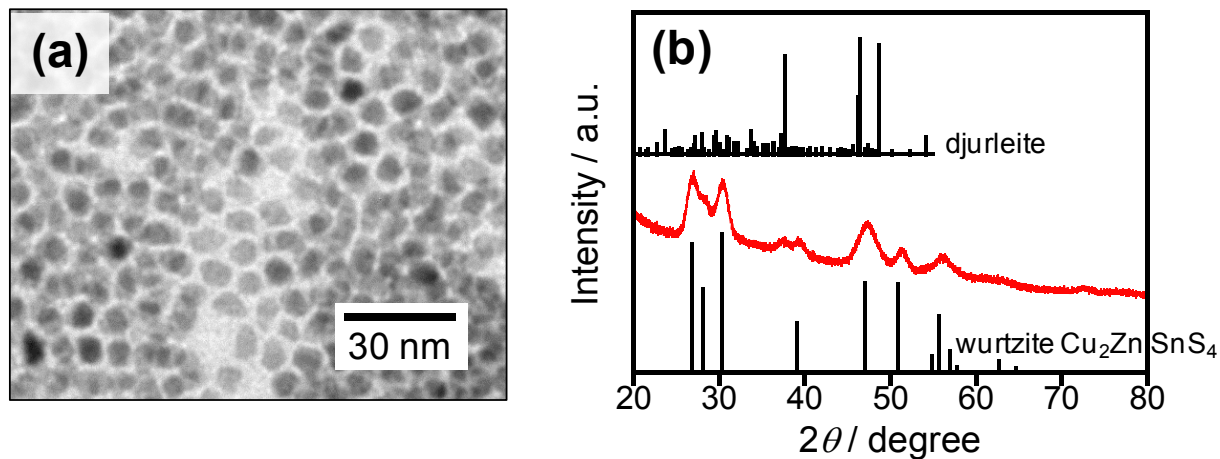

**Fig. S2** TEM image (a) and XRD pattern (b) of nanoparticles obtained by addition of S and DBTU (50 : 50) into the precursor solution at 200 ° C for 180 min. Reference pattern of djurleite (PDF card: #00-034-0660) and simulated pattern of wurtzite-type  $\text{Cu}_2\text{ZnSnS}_4$  shown in ref. 17 are also shown. The chemical composition of the particles was determined to be Cu : Zn : Sn = 0.79 : 0.10 : 0.11.

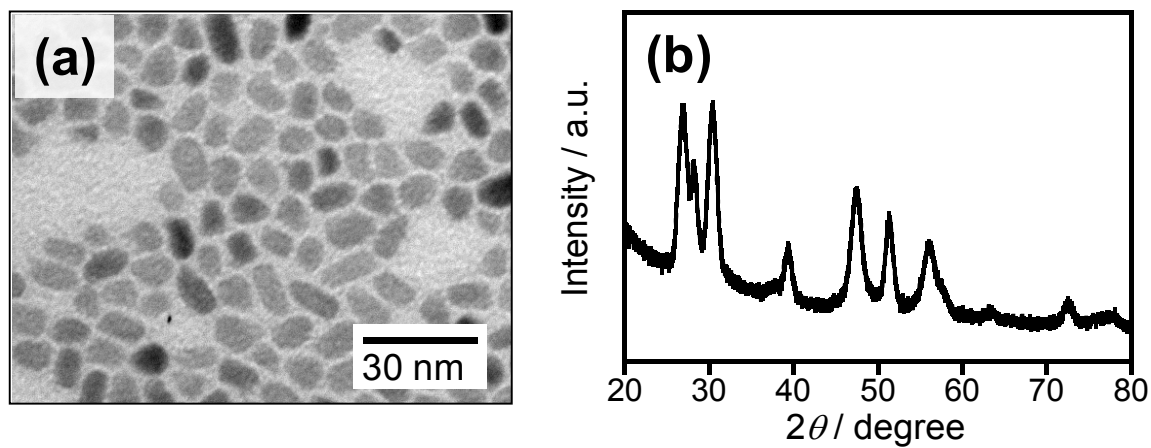

**Fig. S3** TEM image (a) and XRD pattern (b) of  $\text{Cu}_2\text{ZnSnS}_4$  nanoparticles prepared through the nucleation at 150 °C for 30 min followed by the crystal growth process at 240 °C for 30 min.

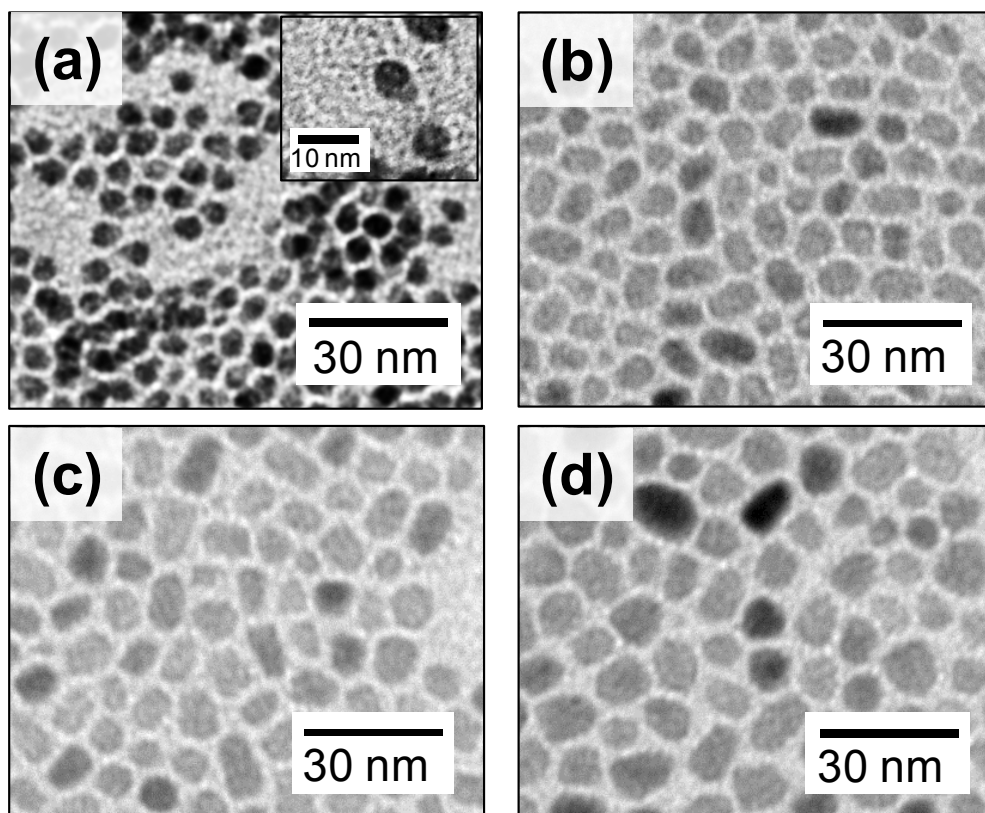

**Fig. S4** TEM images of nanoparticles obtained after the crystal growth process for 0 (a), 15 (b), 60 (c), and 180 min (d). The panel a is the same as Fig. 1a.
